# Supplementary material for: Ln-MOFs using a compartmental ligand with a unique combination of hard–soft terminals and their magnetic, gas adsorption and luminescence properties
Source: Royal Society of Chemistry journal article supplement (doi:10.1039/c9ce01026b), 2019-01-01

## **Journal Supporting Information**

# **Ln-MOFs using a Compartmental Ligand with an Unique Combination of *hard-soft* Terminals and Their Magnetic, Gas Adsorption and Luminescence Properties**

Sudeshna Bhattacharya, SukhenBala\* and Raju Mondal\*

- ❖ **S1. SHAPE calculations**
- ❖ **Powder XRD patterns**
- ❖ **TGA plot**
- ❖ **Luminescence Study**
- ❖ **Circular dichroism spectra**
- ❖ **Crystal data and refinement parameters**
- ❖ **Selected bond lengths and bond angles**
- ❖ **Plot of Debye Equation**

**Table S1- Lanthanide geometry analysis by using Continuous Shape Measurements (CShM)**

| <b>MOF-1(Gd)</b> | <b>EP-9(<math>D_{9h}</math>)</b> | <b>OPY-9(<math>C_{8v}</math>)</b> | <b>HBPY-9(<math>D_{7h}</math>)</b> | <b>JTC-9(<math>C_{3v}</math>)</b> | <b>JCCU-9(<math>C_{4v}</math>)</b> | <b>CCU-9(<math>C_{4v}</math>)</b> | <b>JCSAPR-9(<math>C_{4v}</math>)</b> | <b>CSAPR-9(<math>C_{4v}</math>)</b> | <b>JTCTP R-9(<math>D_{3h}</math>)</b> | <b>TCTPR-9(<math>D_{3h}</math>)</b> |
|------------------|----------------------------------|-----------------------------------|------------------------------------|-----------------------------------|------------------------------------|-----------------------------------|--------------------------------------|-------------------------------------|---------------------------------------|-------------------------------------|
|                  | 32.73053                         | 24.39959                          | 19.44356                           | 12.62698                          | 10.67158                           | 9.56392                           | 2.66004                              | 1.70136                             | 1.77566                               | 1.42769                             |
| <b>MOF-2(Dy)</b> | <b>EP-9(<math>D_{9h}</math>)</b> | <b>OPY-9(<math>C_{8v}</math>)</b> | <b>HBPY-9(<math>D_{7h}</math>)</b> | <b>JTC-9(<math>C_{3v}</math>)</b> | <b>JCCU-9(<math>C_{4v}</math>)</b> | <b>CCU-9(<math>C_{4v}</math>)</b> | <b>JCSAPR-9(<math>C_{4v}</math>)</b> | <b>CSAPR-9(<math>C_{4v}</math>)</b> | <b>JTCTP R-9(<math>D_{3h}</math>)</b> | <b>TCTPR-9(<math>D_{3h}</math>)</b> |
|                  | 34.45702                         | 24.27753                          | 19.94488                           | 13.24954                          | 10.98856                           | 9.65949                           | 2.59881                              | 1.44980                             | 2.08421                               | 1.01514                             |

Ideal structures ML9

EP-9 = Enneagon, OPY-9 = Octagonal pyramid, HBPY-9 = Heptagonal bipyramid, JTC-9 = Johnson triangular cupola J3, JCCU-9 = Capped cube J8, CCU-9 = Spherical-relaxed capped cube, JCSAPR-9 = Capped square antiprism J10, CSAPR-9 = Spherical capped square antiprism, JTCTPR-9 = Tricapped trigonal prism J51, TCTPR-9 = Spherical tricapped trigonal prism

- (a) Alvarez, S., Alemany, P., Casanova, D., Cirera, Lluell, J., M., Avnir, D. *Coord. Chem. Rev.*, 2005, **249**, 1693-1708;  
 (b) Casanova, D., Lluell, M., Alemany, P., Alvarez, S. *Chem. Eur. J.*, 2005, **11**, 1479-1494.

## S1 - Powder XRD patterns:

Compound 1

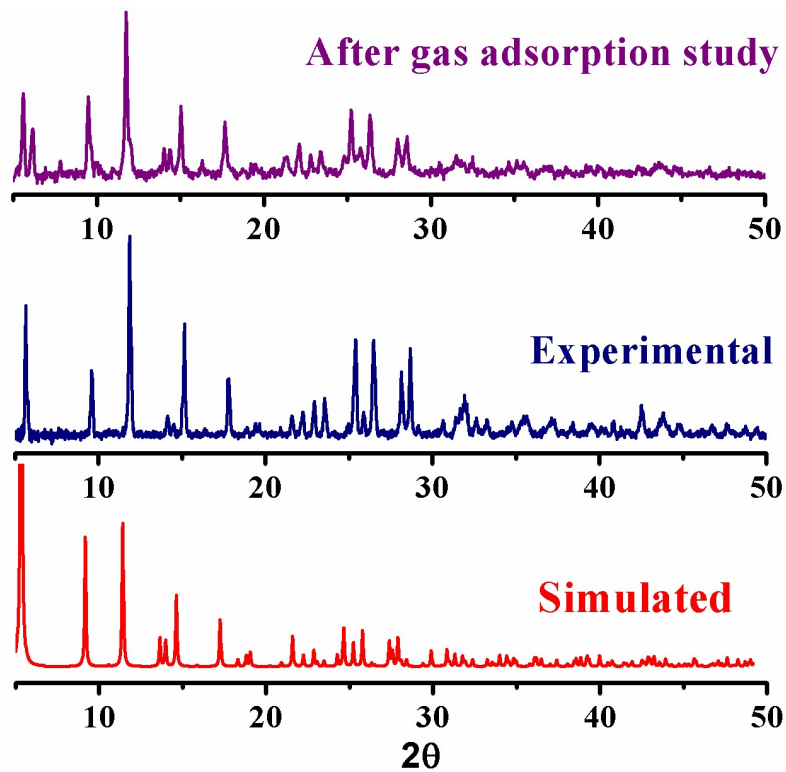

Compound 2

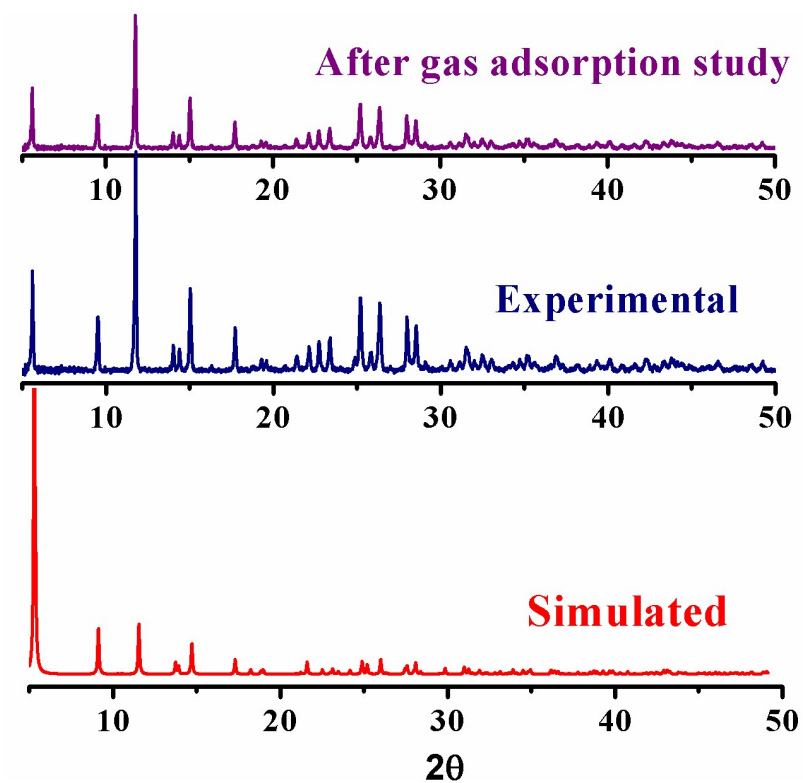

## S2 – TGA Plot:

Compound 1

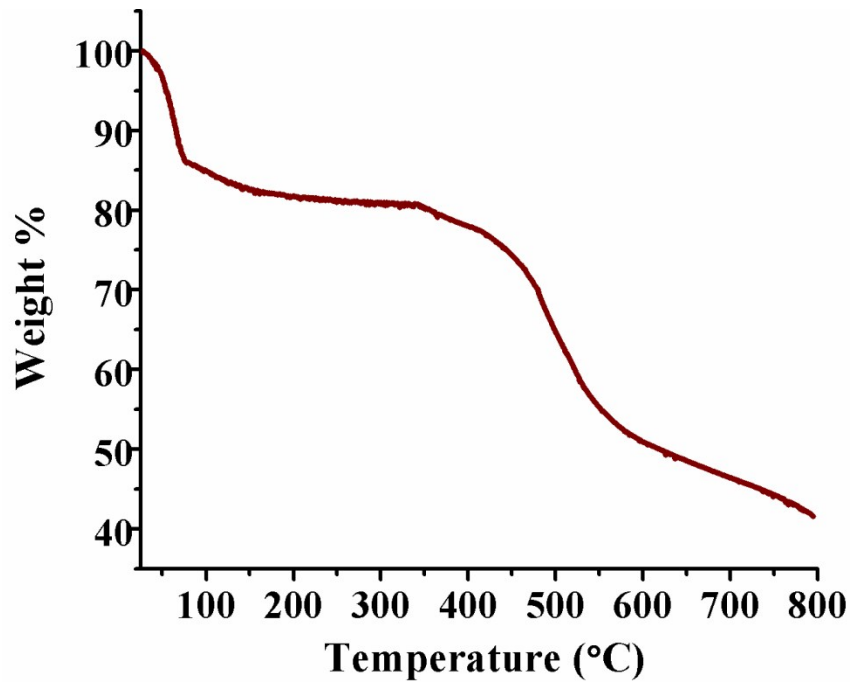

Compound 2

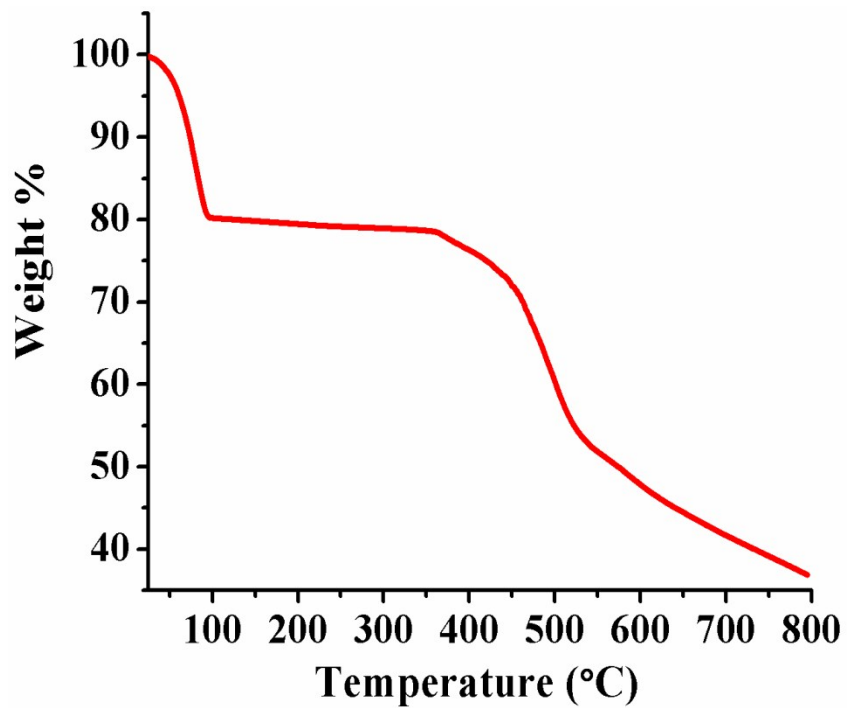

### S3-Luminescence Study:

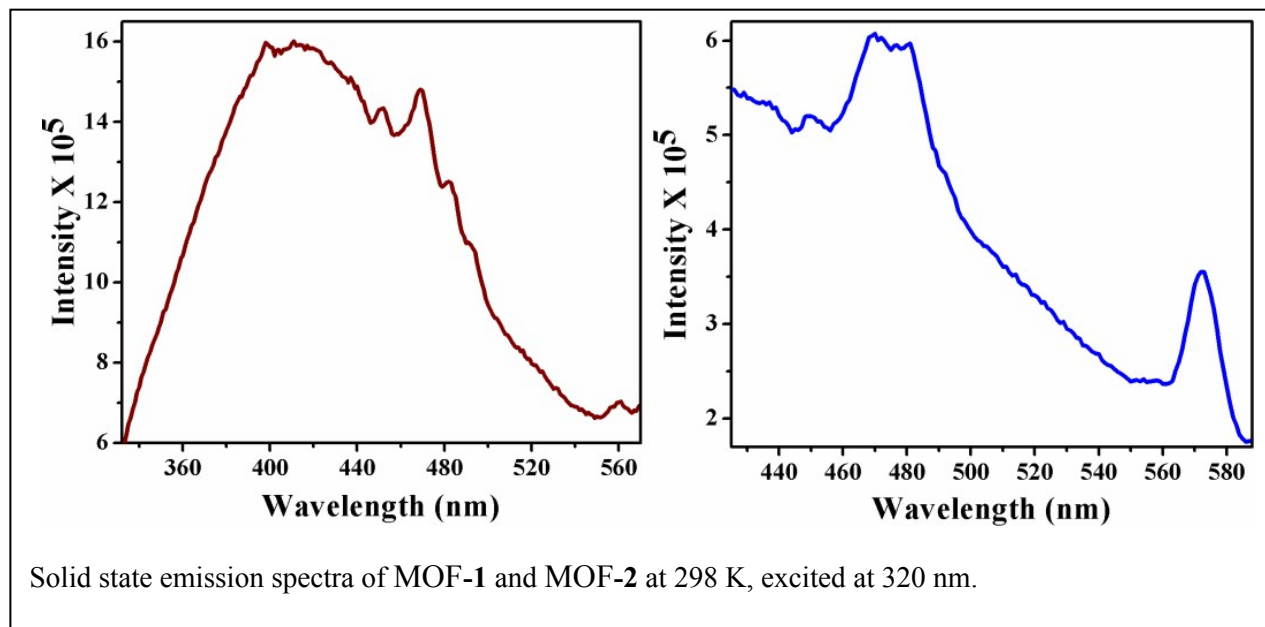

### S4-Circular dichroism spectra

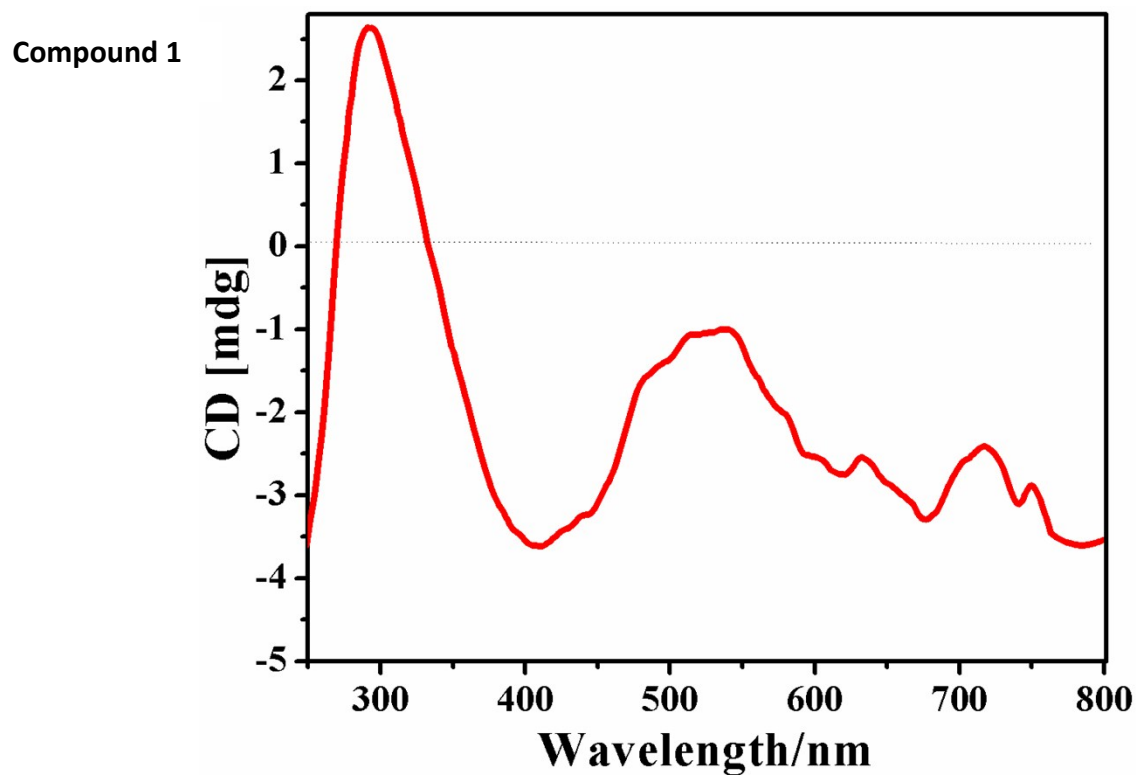

Compound 2

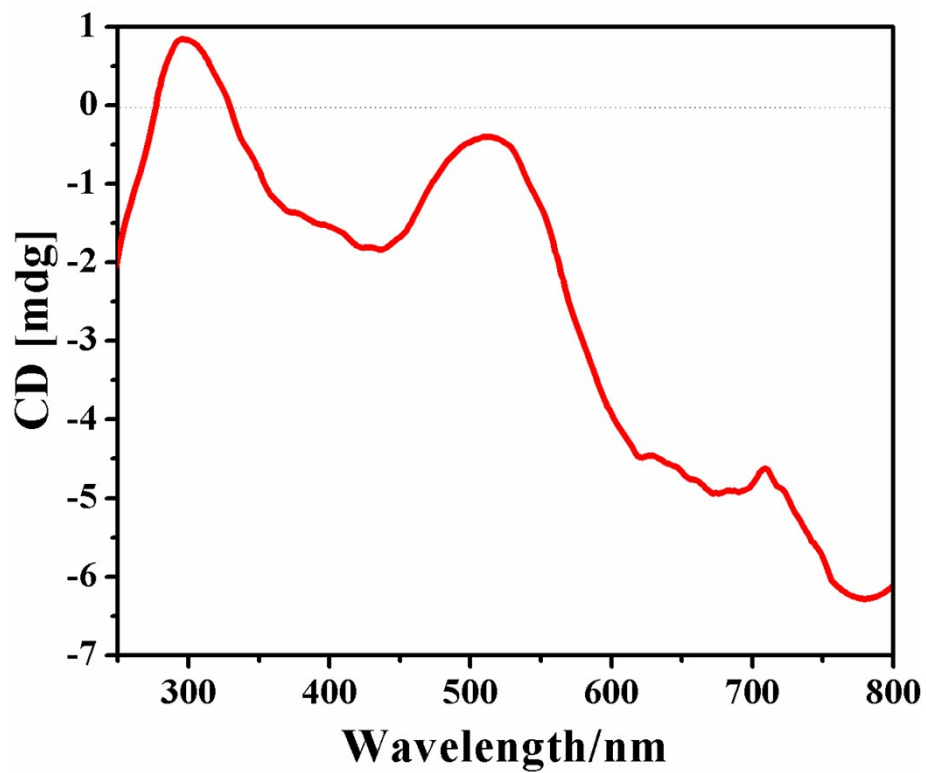

**Table S2: Crystallographic data and refinement parameters of MOF 1-2.**

|                               | <b>1</b>                       | <b>2</b>                       |
|-------------------------------|--------------------------------|--------------------------------|
| Empirical formula             | $C_{90}H_{70}Gd_2N_{18}O_{25}$ | $C_{90}H_{90}Dy_2N_{18}O_{28}$ |
| Crystal system                | trigonal                       | trigonal                       |
| Formula weight                | 2118.14                        | 2196.79                        |
| Space group                   | <i>P3</i>                      | <i>P3</i>                      |
| a/Å                           | 19.109(2)                      | 19.1877(19)                    |
| b/Å                           | 19.109(2)                      | 19.1877(19)                    |
| c/Å                           | 8.6482(11)                     | 8.5095(9)                      |
| $\alpha/^\circ$               | 90.00                          | 90.00                          |
| $\beta/^\circ$                | 90.00                          | 90.00                          |
| $\gamma/^\circ$               | 120.00                         | 120.00                         |
| V/Å <sup>3</sup>              | 2734.9(6)                      | 2713.2(6)                      |
| Reflections collected         | 40923                          | 42867                          |
| Unique reflections            | 11426                          | 11728                          |
| Obsrefls [ $I > 2\sigma(I)$ ] | 10241                          | 6685                           |
| R1 [ $I > 2\sigma(I)$ ]       | 0.0281                         | 0.0728                         |
| wR2 [ $I > 2\sigma(I)$ ]      | 0.0752                         | 0.1506                         |
| CCDC No.                      | 1459327                        | 1459328                        |

**Table S3-Selected bond lengths and bond angles**

| <b>Compound 1</b>  |            |  |                   |            |
|--------------------|------------|--|-------------------|------------|
| <b>Bond Length</b> |            |  | <b>Bond Angle</b> |            |
| Gd1 O1B            | 2.297(4)   |  | N1A Gd1 N1A       | 80.16(16)  |
| Gd1 N2A            | 2.589(4)   |  | O1B Gd1 N1A       | 130.42(12) |
| Gd1 N1A            | 2.727(5)   |  | O1B Gd1 N1A       | 82.54(14)  |
| Gd2 O1A            | 2.323(4)   |  | O1B Gd1 N1A       | 141.12(12) |
| Gd2 N2B            | 2.565(4)   |  | O1A Gd2 O1A       | 80.81(17)  |
| Gd2 N1B            | 2.706(5)   |  | O1A Gd2 N2B       | 144.29(17) |
|                    |            |  | O1A Gd2 N2B       | 71.17(14)  |
| <b>Bond Angle</b>  |            |  | O1A Gd2 N2B       | 73.37(15)  |
| O1B Gd1 O1B        | 82.71(16)  |  | N2B Gd2 N2B       | 118.97(4)  |
| O1B Gd1 N2A        | 71.80(14)  |  | O1A Gd2 N1B       | 141.23(13) |
| O1B Gd1 N2A        | 144.25(15) |  | O1A Gd2 N1B       | 131.85(12) |
| O1B Gd1 N2A        | 69.80(14)  |  | O1A Gd2 N1B       | 84.61(15)  |
| N2A Gd1 N2A        | 119.38(3)  |  | N2B Gd2 N1B       | 60.69(14)  |
| N2A Gd1 N2A        | 119.38(3)  |  | N2B Gd2 N1B       | 131.07(15) |
| O1B Gd1 N1A        | 82.54(14)  |  | N2B Gd2 N1B       | 67.93(15)  |
| O1B Gd1 N1A        | 141.12(12) |  | N1B Gd2 N1B       | 78.83(16)  |
| O1B Gd1 N1A        | 130.43(12) |  | N2B Gd2 N1B       | 67.93(15)  |
| N2A Gd1 N1A        | 60.63(13)  |  | N2B Gd2 N1B       | 60.70(14)  |
| N2A Gd1 N1A        | 69.36(13)  |  | N2B Gd2 N1B       | 131.07(15) |
| N2A Gd1 N1A        | 133.14(14) |  | N1B Gd2 N1B       | 78.83(16)  |
| <b>Compound 2</b>  |            |  |                   |            |
| <b>Bond Length</b> |            |  | <b>Bond Angle</b> |            |
| Dy1 O1             | 2.305(16)  |  | N2A Dy1 N1A       | 61.2(6)    |
| Dy1 N2A            | 2.494(19)  |  | N2A Dy1 N1A       | 68.8(6)    |
| Dy1 N1A            | 2.67(2)    |  | N2A Dy1 N1A       | 132.0(6)   |
| Dy2 O1A            | 2.295(16)  |  | N1A Dy1 N1A       | 78.8(6)    |
| Dy2 N2             | 2.630(19)  |  | O1A Dy2 O1A       | 82.5(7)    |
| Dy2 N1             | 2.70(2)    |  | O1A Dy2 N2        | 70.4(6)    |
|                    |            |  | O1A Dy2 N2        | 70.8(6)    |
| <b>Bond Angle</b>  |            |  | O1A Dy2 N2        | 143.9(6)   |
| O1 Dy1 O1          | 79.9(7)    |  | N2 Dy2 N2         | 119.46(13) |
| O1 Dy1 N2A         | 142.8(6)   |  | O1A Dy2 N1        | 131.4(6)   |
| O1 Dy1 N2A         | 71.1(6)    |  | O1A Dy2 N1        | 82.1(6)    |
| O1 Dy1 N2A         | 72.6(6)    |  | O1A Dy2 N1        | 139.9(6)   |
| N2A Dy1 N2A        | 119.28(13) |  | N2 Dy2 N1         | 61.0(7)    |
| O1 Dy1 N1A         | 141.2(5)   |  | N2 Dy2 N1         | 134.0(7)   |
| O1 Dy1 N1A         | 132.3(5)   |  | N2 Dy2 N1         | 69.1(6)    |
| O1 Dy1 N1A         | 85.2(6)    |  | N1 Dy2 N1         | 80.9(7)    |



## S5-Plot of Debye Equation

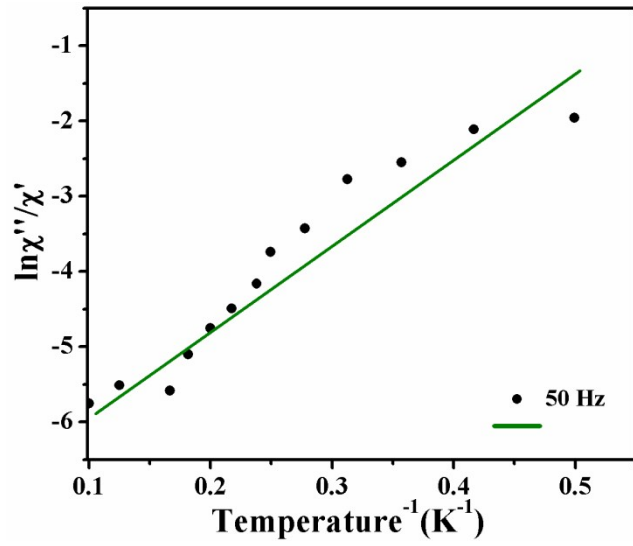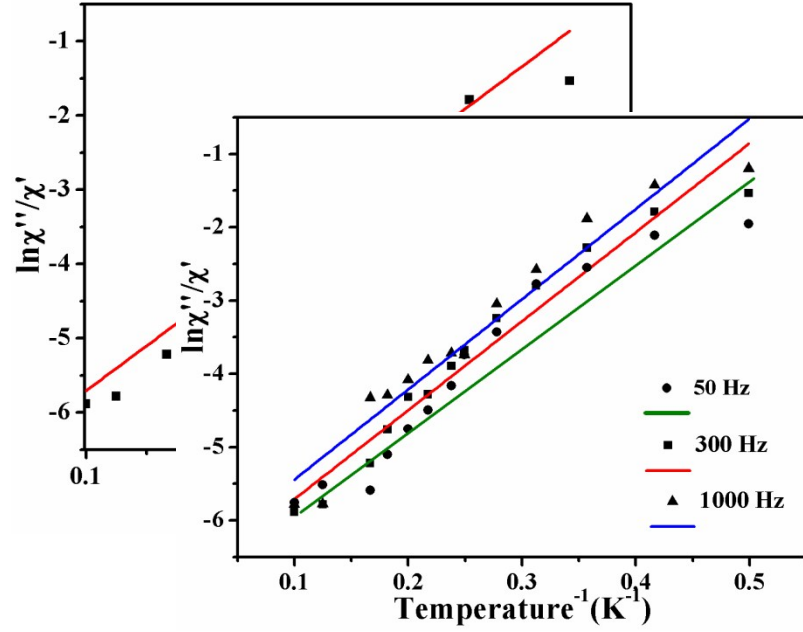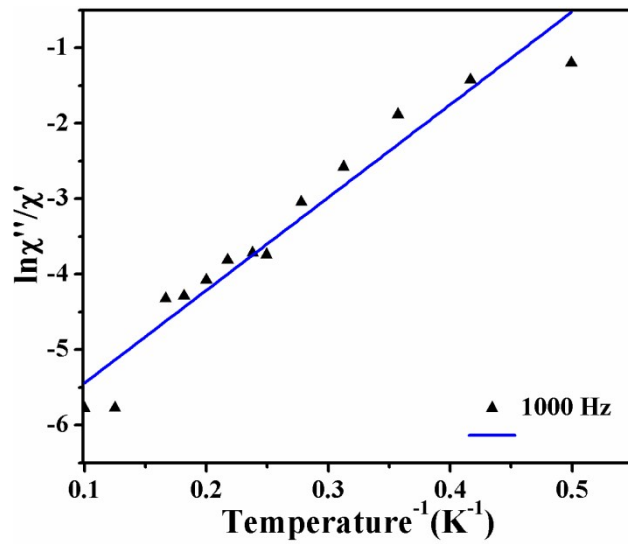

Supplement: c9ce01026b1.pdf [file c9ce01026b1.pdf]
